# Supplementary material for: Data-based wildfire risk model for Mediterranean ecosystems – case study of the Concepción metropolitan area in central Chile
Source: Copernicus journal article supplement (doi:10.5194/nhess-21-3663-2021), 2021-12-03

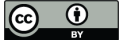

*Supplement of*

## **Data-based wildfire risk model for Mediterranean ecosystems – case study of the Concepción metropolitan area in central Chile**

**Edilia Jaque Castillo et al.**

*Correspondence to:* Alfonso Fernández (alfernandez@udec.cl)

The copyright of individual parts of the supplement might differ from the article licence.

Supplementary Figure S1: Recorded fire recurrence according to the compiled database and using equation (1).

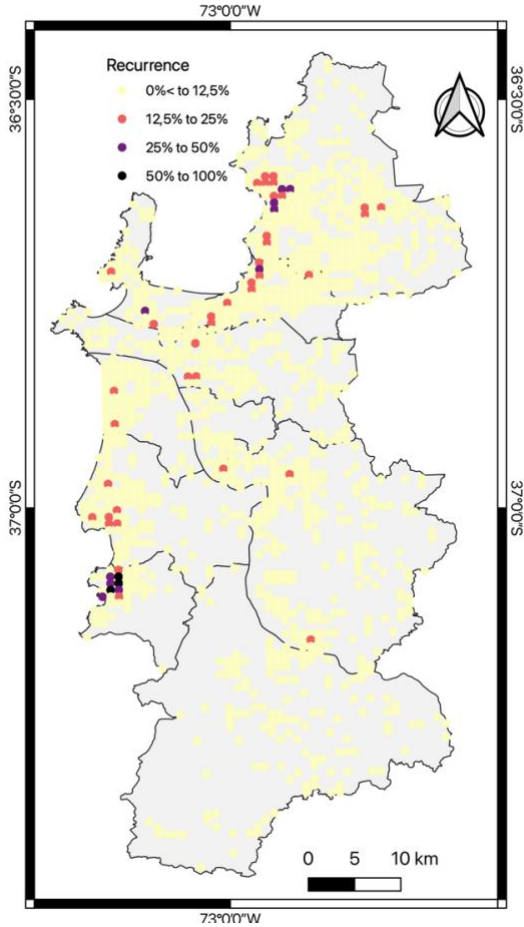

Supplement: Supplementary file 1 [file nhess-21-3663-2021-supplement.pdf]
